# Supplementary material for: Bergmann’s Rule under Rocks: Testing the Influence of Latitude and Temperature on a Chiton from Mexican Marine Ecoregions
Source: MDPI journal article supplement (doi:10.3390/biology12060766), 2023-05-24
Supplement: s1 [file s1]

## Supplementary Material

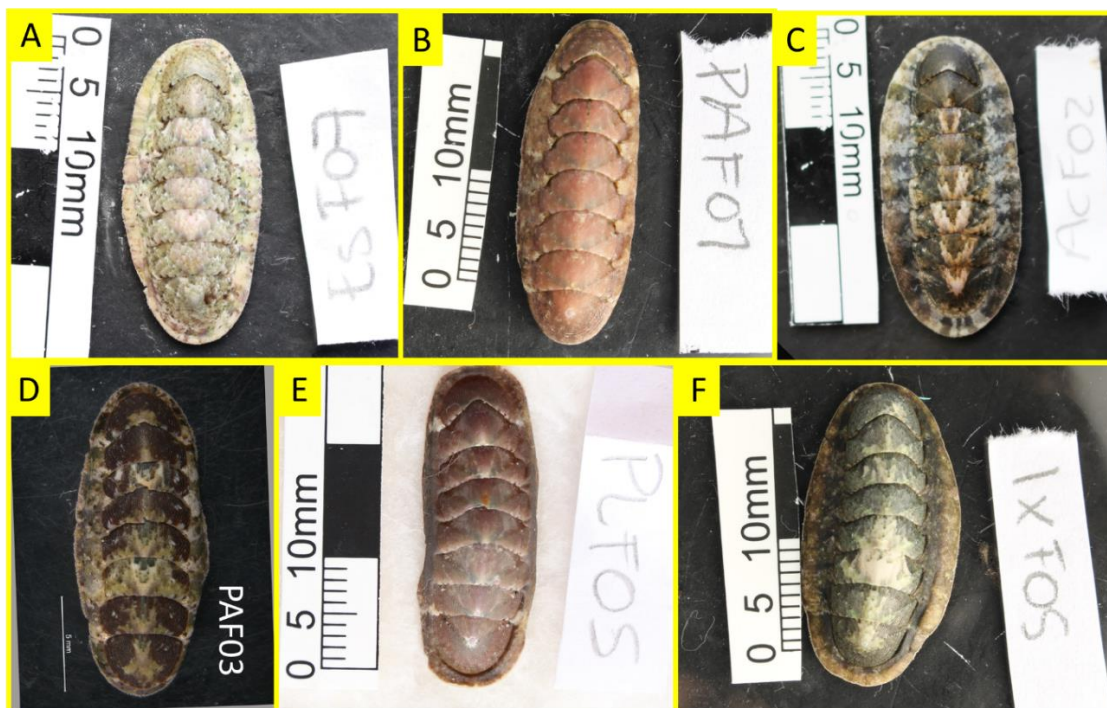

**Figure S1.** A-C. Selected individuals. D-F. Discarded individuals (D. valves without pustules; E. Crooked individual, and valves without pustules; F. Crooked individual).

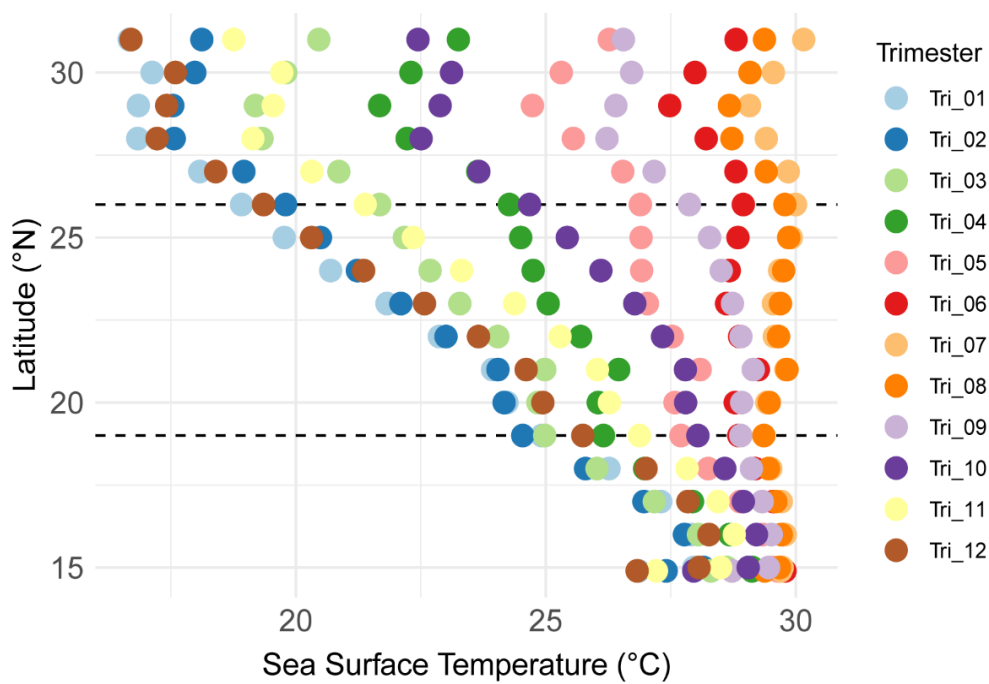

**Figure S2.** Sea Surface Temperature per trimester along the latitude, dotted lines separate the marine ecoregions.

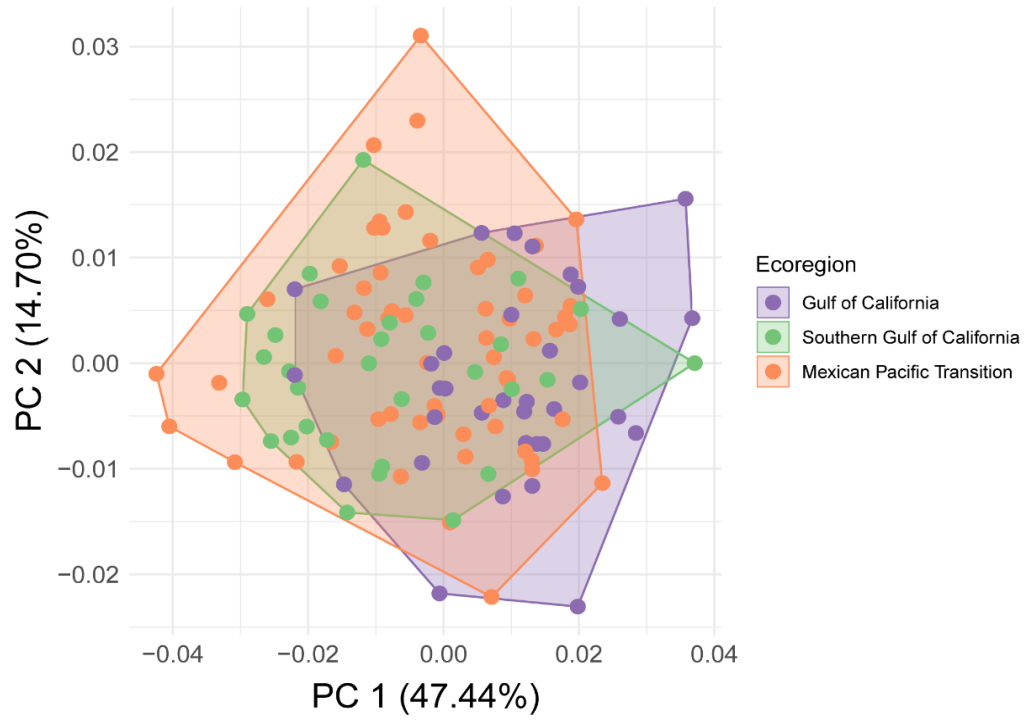

**Figure S3.** Principal Component Analysis. Polygons represent the different marine ecoregions.

**Table S1.** Sampling site information. Depth is considered during low tidal. Sites with few individuals were matched with closer sites (latitudes or coast similar) displayed by /.

| Marine ecoregion            | ID    | Localities                             | Latitude (° N)          | Depth (m) | Number of individuals |
|-----------------------------|-------|----------------------------------------|-------------------------|-----------|-----------------------|
| Gulf of California          | Pc    | Puertecitos                            | 30.33979                | 1         | 10                    |
|                             | PL    | Sonora<br>Puerto Lobos                 | 30.264409               | 0         | 4                     |
|                             | BA/KN | Bahía de los<br>Ángeles/<br>Kino Nuevo | 29.031949/<br>28.872907 | 1.5/0.2   | 1/2                   |
|                             | Ch    | Punta Chivato                          | 27.069705               | 1         | 13                    |
|                             | Jn/Sg | Baja Sur<br>(Juncalito/Sargento)       | 25.843097/<br>24.34138  | 1/0.3     | 2/2                   |
| Southern Gulf of California | Gy    | Guaymas                                | 27.935749               | 7         | 9                     |
|                             | IV    | Mazatlán                               | 23.233749<br>23.21      | 0.20      | 13                    |
|                             | PM    | Punta Mita                             | 20.784561               | 1         | 10                    |
| Mexican Pacific Transition  | Cc    | Isla Cocinas                           | 19.546819               | 3         | 7                     |
|                             | IZ    | Ixtapa/<br>Zihuatanejo                 | 17.676791/<br>17.621519 | 0.5/1     | 5/7<br>12             |
|                             | Ac    | Acapulco                               | 16.844586               | 2.5       | 12                    |
|                             | Es    | Puerto Escondido                       | 15.857662               | 4         | 15                    |
|                             | Hu    | Huatulco                               | 15.760918               | 4         | 13                    |

Table S2. Coordinates of satellite data of Surface Sea Temperature per latitude used on [ERDDAP](#)

| Latitude | °N              | °W                |
|----------|-----------------|-------------------|
| 31       | 30.925 - 32.025 | 245.025 - 247.025 |
| 30       | 29.925 - 31.025 | 245.125 - 247.325 |
| 29       | 28.925 - 30.025 | 245.523 - 248.025 |
| 28       | 27.925 - 29.025 | 246.325 - 249.025 |
| 27       | 26.925 - 28.025 | 247.125 - 250.225 |
| 26       | 25.925 - 27.025 | 247.925 - 250.925 |
| 25       | 24.925 - 26.025 | 248.625 - 252.025 |
| 24       | 23.925 - 25.025 | 249.225 - 253.025 |
| 23       | 22.925 - 24.025 | 250.025 - 254.025 |
| 22       | 21.925 - 23.025 | 252.025 - 254.425 |
| 21       | 20.925 - 22.025 | 252.025 - 254.825 |
| 20       | 19.925 - 21.025 | 252.525 - 254.725 |
| 19       | 18.925 - 20.025 | 253.525 - 256.025 |
| 18       | 17.925 - 19.025 | 255.025 - 257.525 |
| 17       | 16.925 - 18.025 | 257.025 - 260.025 |
| 16       | 15.925 - 17.025 | 259.025 - 262.225 |
| 15       | 15.325 - 15.975 | 261.725 - 263.525 |
